# Supplementary material
Source: PubMed Central journal article supplement (PMC5592157)
Supplement: NIHMS901173-supplement-Supplementary_Information.pdf [file NIHMS901173-supplement-Supplementary_Information.pdf]

# Bafilomycins Produced by an Endophytic Actinomycete *Streptomyces* sp. YIM56209<sup>†</sup>

Zhiguo Yu,<sup>1,2</sup> Li-Xing Zhao,<sup>3</sup> Cheng-Lin Jiang,<sup>3</sup> Yanwen Duan,<sup>2</sup> Lily Wong,<sup>4</sup> Kristopher C. Carver,<sup>4</sup> Linda A. Schuler,<sup>4</sup> and Ben Shen<sup>1,5,6\*</sup>

<sup>1</sup>Division of Pharmaceutical Sciences, University of Wisconsin-Madison, Madison, Wisconsin 53705, USA; <sup>2</sup>Hunan Engineering Research Center of Combinatorial Biosynthesis and Natural Product Drug Discovery, Changsha, Hunan 410329, China; <sup>3</sup>Yunnan Institute of Microbiology, Yunnan University, Kunming, Yunnan 650091, China; <sup>4</sup>Department of Comparative Biosciences, University of Wisconsin-Madison, Madison, Wisconsin 53706, USA; <sup>5</sup>University of Wisconsin National Cooperative Drug Discovery Group, University of Wisconsin-Madison, Madison, Wisconsin 53705, USA; and <sup>6</sup>Department of Chemistry, University of Wisconsin-Madison, Madison, Wisconsin 53705, USA

TITLE RUNNING HEAD: New Bafilomycins from *Streptomyces* sp. YIM56209

\*To whom correspondence should be addressed: Ben Shen, Division of Pharmaceutical Sciences, School of Pharmacy, University of Wisconsin-Madison, 777 Highland Ave., Madison, WI 53705-2222, USA. Tel: (608) 263-2673, Fax: (608) 262-5345, E-mail: [bshen@pharmacy.wisc.edu](mailto:bshen@pharmacy.wisc.edu)

<sup>†</sup>Dedicated to the late Professor C. Richard “Dick” Hutch for his exceptional contributions to natural product biosynthesis, engineering, and drug discovery.

## Supplementary Information

|                                                                                                                  |           |
|------------------------------------------------------------------------------------------------------------------|-----------|
| <b>Experimentals</b> (cytotoxicity and ERK1/2 phosphorylation assays)                                            | <b>S2</b> |
| <b>Table S1.</b> <sup>1</sup> H NMR data of <b>1</b> and <b>2</b> in comparison with bafilomycin D ( <b>3</b> )  | <b>S3</b> |
| <b>Table S2.</b> <sup>13</sup> C NMR data of <b>1</b> and <b>2</b> in comparison with bafilomycin D ( <b>3</b> ) | <b>S4</b> |
| <b>Figure S1.</b> <sup>1</sup> H NMR spectrum of <b>1</b> (500 MHz, CDCl <sub>3</sub> )                          | <b>S5</b> |
| <b>Figure S2.</b> <sup>13</sup> C NMR spectrum of <b>1</b> (125 MHz, CDCl <sub>3</sub> )                         | <b>S5</b> |
| <b>Figure S3.</b> <sup>1</sup> H NMR spectrum of <b>2</b> (500 MHz, CDCl <sub>3</sub> )                          | <b>S6</b> |
| <b>Figure S4.</b> <sup>13</sup> C NMR spectrum of <b>2</b> (125 MHz, CDCl <sub>3</sub> )                         | <b>S6</b> |

## EXPERIMENTALS

**Cytotoxicity test.** The cytotoxicities of bafilomycins were tested on two cell lines, human lung carcinoma (A-549) and human colon carcinoma (HT-29). Both of cell lines were maintained as previously reported.<sup>1</sup> Cells were harvested by trypsinization using 0.25% trypsin and 0.1% EDTA and then counted in a ViCell XR coulter in duplicate, before and after dilution for assay plating. Cell plating, compound handling, and assay set up were performed as previously reported.<sup>1</sup> Calcein AM (acetoxymethyl ester) reagent (30  $\mu$ L, 1M) was added and the cells were incubated for 30 min at 37°C. Plates were read for emission by using a fluoresce filter (excitation 485 nm, emission 535 nm). An equal volume (30  $\mu$ L) of cell titer-glo reagent (Promega, Madison, WI, USA) was added and incubated for 10 min at room temperature with gentle agitation to lyse the cells. Each plate was re-read for luminescence to confirm the inhibition observed in the fluorescent Calcein AM assay. The data represent the mean of three experiments performed in triplicate and are expressed as means  $\pm$  standard deviation (SD).

Reference 1: Li, W., Ju, J., Rajski, S. R., Osada, H. & Shen, B. Characterization of the tautomycin biosynthetic gene cluster from *Streptomyces spiroverticillatus* unveiling new insights into dialkylmaleic anhydride and polyketide biosynthesis. *J. Biol. Chem.* **283**, 28607-28617 (2008).

**High-throughput in-cell western analysis.** Human breast cancer (MCF-7) cells were plated at  $1.5 \times 10^4$  cells/well in 384-well CellBIND<sup>®</sup> microplates (#3683; Corning Inc., Corning, NY). After 24-48 h of serum-starvation, cells were incubated at 37 °C in the presence of vehicle or bafilomycins for 1 h prior to addition of PRL (400 ng/mL; 16 nM) or EGF (120 ng/mL; 18.75 nM) stimulation for 15 min. Cells were then fixed for 4 h with Prefer fixative (#411; Anatech Ltd, Battle Creek, MI), permeabilized for 30 min using 1% Triton in 1xPBS, and blocked overnight at 4 °C using SEA BLOCK blocking buffer (#37527; Pierce Biotechnology, Rockford, IL). Cells were incubated with primary antibody (p-ERK1/2, 1:2500) for 2 h and secondary antibody (IRDye 800CW, 1:10000) for 1 h at 25 °C with gentle shaking. p-ERK1/2 signals were detected at 800 nm and quantified using the Odyssey<sup>®</sup> Infrared Imaging System (LI-COR Biosciences, Lincoln, NE). Cell-permeable red fluorescent nucleic acid-staining SYTO<sup>®</sup> dyes were used to control for cell number within each well. Briefly, cells were incubated with SYTO 62 (1:25000) for 30 min at 37°C, and emission was detected at 700 nm using the Odyssey<sup>®</sup> Infrared Imaging System. All liquid handling was performed using a BioMek<sup>®</sup> FX Laboratory Automation Workstation (Beckman Coulter, Fullerton, CA). IC<sub>50</sub> values were derived using Prism v4.00 (GraphPad Software, Inc., San Diego, CA), and represent the means of at least 2 experiments performed in triplicate.

**Table S1** <sup>1</sup>H NMR data of **1** and **2** in comparison with bafilomycin D (**3**)

| Position | 9-Hydroxybafilomycin D ( <b>1</b> ) in CDCl <sub>3</sub><br>δ ( <sup>1</sup> H) [p.p.m.] <i>J</i> in Hz | 29-Hydroxybafilomycin D ( <b>2</b> ) in CDCl <sub>3</sub><br>δ ( <sup>1</sup> H) [p.p.m.] <i>J</i> in Hz | Bafilomycin D ( <b>3</b> ) in CDCl <sub>3</sub><br>δ ( <sup>1</sup> H) [p.p.m.] <i>J</i> in Hz |
|----------|---------------------------------------------------------------------------------------------------------|----------------------------------------------------------------------------------------------------------|------------------------------------------------------------------------------------------------|
| 1        | –                                                                                                       | –                                                                                                        | –                                                                                              |
| 2        | –                                                                                                       | –                                                                                                        | –                                                                                              |
| 3        | 6.63 (1H, s)                                                                                            | 6.60 (1H, s)                                                                                             | 6.64 (1H, s)                                                                                   |
| 4        | –                                                                                                       | –                                                                                                        | –                                                                                              |
| 5        | 5.73 (1H, d, 9.0)                                                                                       | 5.81 (1H, d, 9.0)                                                                                        | 5.76 (1H, d, 9.0)                                                                              |
| 6        | 2.54 (1H, m)                                                                                            | 2.54 (1H, m)                                                                                             | 2.52 (1H, m)                                                                                   |
| 7        | 3.41 (1H, d, 7.0)                                                                                       | 3.43 (1H, d, 7.0)                                                                                        | 3.30 (1H, d, 7.0)                                                                              |
| 8        | 2.31 (1H, m)                                                                                            | 1.91 (1H, m)                                                                                             | 1.91 (1H, m)                                                                                   |
| 9        | 3.85 (1H, d, 10.5)                                                                                      | 2.30 (1H, m), 2.10 (1H, m)                                                                               | 2.12 (1H, m), 1.99 (1H, m)                                                                     |
| 10       | –                                                                                                       | –                                                                                                        | –                                                                                              |
| 11       | 6.02 (1H, d, 10.5)                                                                                      | 5.90 (1H, d, 11.0)                                                                                       | 5.81 (1H, d, 11.0)                                                                             |
| 12       | 6.51 (1H, dd, 14.5, 11.0)                                                                               | 6.64 (1H, dd, 15.0, 11.0)                                                                                | 6.48 (1H, dd, 15.0, 10.5)                                                                      |
| 13       | 5.29 (1H, dd, 15.0, 9.5)                                                                                | 5.23 (1H, dd, 15.0, 9.5)                                                                                 | 5.17 (1H, dd, 15.0, 9.0)                                                                       |
| 14       | 3.81 (1H, dd, 8.5, 8.0)                                                                                 | 3.81 (1H, dd, 8.5, 8.0)                                                                                  | 3.82 (1H, dd, 8.5, 8.0)                                                                        |
| 15       | 5.05 (1H, d, 8.5)                                                                                       | 5.05 (1H, d, 9.0)                                                                                        | 5.06 (1H, d, 8.5)                                                                              |
| 16       | 2.06 (1H, m)                                                                                            | 2.07 (1H, m)                                                                                             | 2.06 (1H, m)                                                                                   |
| 17       | 3.77 (1H, m)                                                                                            | 3.76 (1H, m)                                                                                             | 3.76 (1H, m)                                                                                   |
| 18       | 2.97 (1H, m)                                                                                            | 2.97 (1H, m)                                                                                             | 2.98 (1H, m)                                                                                   |
| 19       | –                                                                                                       | –                                                                                                        | –                                                                                              |
| 20       | 6.28 (1H, d, 16.0)                                                                                      | 6.29 (1H, d, 16.0)                                                                                       | 6.28 (1H, d, 15.5)                                                                             |
| 21       | 6.90 (1H, dd, 15.5, 8.0)                                                                                | 6.90 (1H, dd, 16.0, 8.0)                                                                                 | 6.91 (1H, dd, 16.0, 8.5)                                                                       |
| 22       | 2.54 (1H, m)                                                                                            | 2.52 (1H, m)                                                                                             | 2.52 (1H, m)                                                                                   |
| 23       | 3.18 (1H, t, 6.0)                                                                                       | 3.18 (1H, t, 6.0)                                                                                        | 3.18 (1H, t, 6.0)                                                                              |
| 24       | 1.72 (1H, m)                                                                                            | 1.73 (1H, m)                                                                                             | 1.72 (1H, m)                                                                                   |
| 25       | 0.92 (3H, d, 7.0)                                                                                       | 0.93 (3H, d, 7.0)                                                                                        | 0.92 (3H, d, 7.0)                                                                              |
| 26       | 1.98 (3H, s)                                                                                            | 1.98 (3H, s)                                                                                             | 1.98 (3H, s)                                                                                   |
| 27       | 1.07 (3H, d, 7.0)                                                                                       | 1.07 (3H, d, 7.0)                                                                                        | 1.07 (3H, d, 6.5)                                                                              |
| 28       | 0.95 (3H, d, 7.0)                                                                                       | 0.97 (3H, d, 7.0)                                                                                        | 0.95 (3H, d, 7.5)                                                                              |
| 29       | 2.03 (3H, s)                                                                                            | 4.58 (1H, d, 12.5), 4.07 (1H, d, 12.5)                                                                   | 1.91 (3H, s)                                                                                   |
| 30       | 0.95 (3H, d, 7.0)                                                                                       | 0.95 (3H, d, 7.0)                                                                                        | 0.94 (3H, d, 6.5)                                                                              |
| 31       | 1.21 (3H, d, 7.0)                                                                                       | 1.21 (3H, d, 7.0)                                                                                        | 1.21 (3H, d, 7.0)                                                                              |
| 32       | 1.08 (3H, d, 6.5)                                                                                       | 1.08 (3H, d, 6.5)                                                                                        | 1.08 (3H, d, 7.0)                                                                              |
| 33       | 0.95 (3H, d, 7.0)                                                                                       | 0.95 (3H, d, 7.0)                                                                                        | 0.94 (3H, d, 6.5)                                                                              |
| 2-OMe    | 3.68 (3H, s)                                                                                            | 3.67 (3H, s)                                                                                             | 3.68 (3H, s)                                                                                   |
| 14-OMe   | 3.22 (3H, s)                                                                                            | 3.21 (3H, s)                                                                                             | 3.22 (3H, s)                                                                                   |

**Table S2**  $^{13}\text{C}$  NMR data of **1** and **2** in comparison with bafilomycin D (**3**)

| Position | 9-Hydroxybafilomycin D ( <b>1</b> ) in $\text{CDCl}_3$ | 29-Hydroxybafilomycin D ( <b>2</b> ) in $\text{CDCl}_3$ | Bafilomycin D ( <b>3</b> ) in $\text{CDCl}_3$ |
|----------|--------------------------------------------------------|---------------------------------------------------------|-----------------------------------------------|
| 1        | 166.7                                                  | 166.4                                                   | 166.7                                         |
| 2        | 141.8                                                  | 141.6                                                   | 141.7                                         |
| 3        | 133.2                                                  | 132.6                                                   | 133.2                                         |
| 4        | 133.4                                                  | 133.2                                                   | 133.0                                         |
| 5        | 141.0                                                  | 142.1                                                   | 142.6                                         |
| 6        | 37.2                                                   | 36.6                                                    | 37.1                                          |
| 7        | 80.0                                                   | 81.4                                                    | 81.5                                          |
| 8        | 38.8                                                   | 40.6                                                    | 40.1                                          |
| 9        | 77.2                                                   | 36.5                                                    | 41.6                                          |
| 10       | 147.2                                                  | 143.7                                                   | 143.1                                         |
| 11       | 125.5                                                  | 128.1                                                   | 125.5                                         |
| 12       | 133.3                                                  | 132.0                                                   | 133.1                                         |
| 13       | 130.5                                                  | 129.5                                                   | 127.3                                         |
| 14       | 83.4                                                   | 83.0                                                    | 83.6                                          |
| 15       | 76.7                                                   | 76.2                                                    | 76.6                                          |
| 16       | 38.8                                                   | 38.3                                                    | 38.8                                          |
| 17       | 72.9                                                   | 72.2                                                    | 72.9                                          |
| 18       | 46.6                                                   | 46.4                                                    | 46.5                                          |
| 19       | 203.4                                                  | 203.0                                                   | 203.4                                         |
| 20       | 129.6                                                  | 129.3                                                   | 129.6                                         |
| 21       | 148.9                                                  | 148.5                                                   | 148.8                                         |
| 22       | 40.3                                                   | 40.0                                                    | 40.3                                          |
| 23       | 80.0                                                   | 79.8                                                    | 80.0                                          |
| 24       | 31.2                                                   | 30.9                                                    | 31.2                                          |
| 25       | 17.0                                                   | 16.8                                                    | 17.1                                          |
| 26       | 14.2                                                   | 14.1                                                    | 14.2                                          |
| 27       | 17.4                                                   | 17.0                                                    | 17.7                                          |
| 28       | 18.2                                                   | 22.0                                                    | 22.2                                          |
| 29       | 18.8                                                   | 63.1                                                    | 20.2                                          |
| 30       | 10.9                                                   | 10.6                                                    | 11.0                                          |
| 31       | 10.6                                                   | 10.2                                                    | 10.5                                          |
| 32       | 16.9                                                   | 16.6                                                    | 16.9                                          |
| 33       | 19.9                                                   | 19.7                                                    | 19.9                                          |
| 2-OMe    | 60.5                                                   | 60.1                                                    | 60.4                                          |
| 14-OMe   | 56.0                                                   | 55.8                                                    | 55.9                                          |

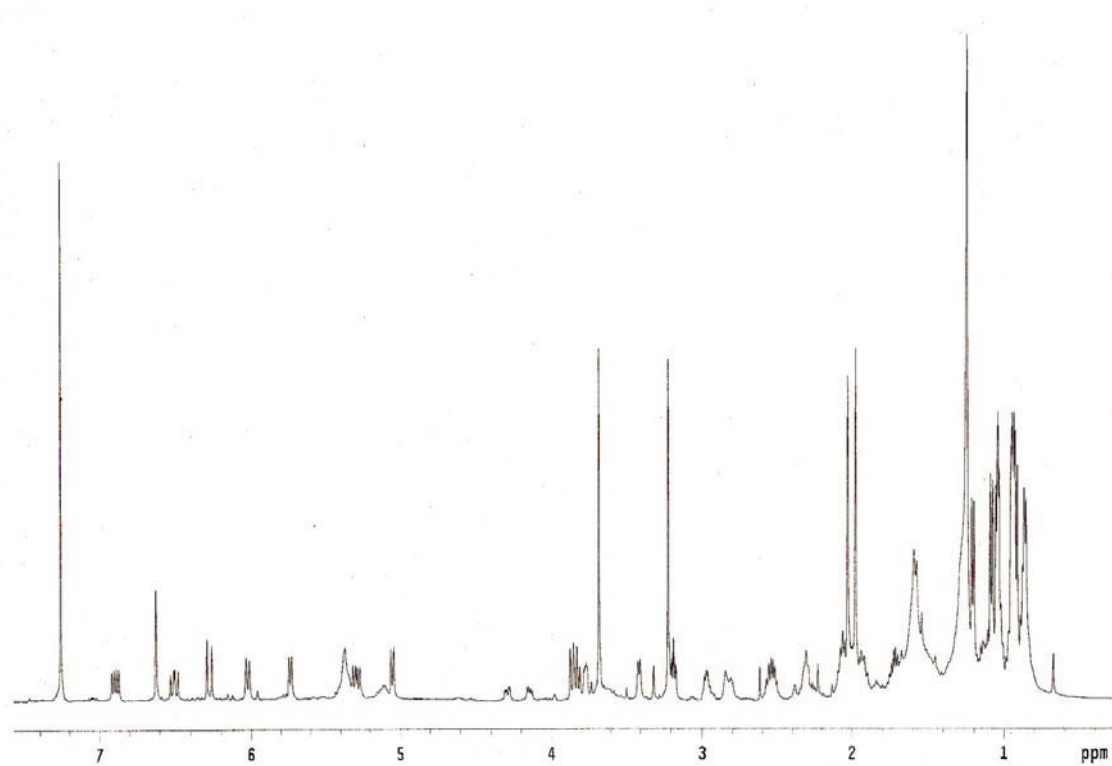

**Figure S1** <sup>1</sup>H NMR spectrum of **1** (500 MHz, CDCl<sub>3</sub>)

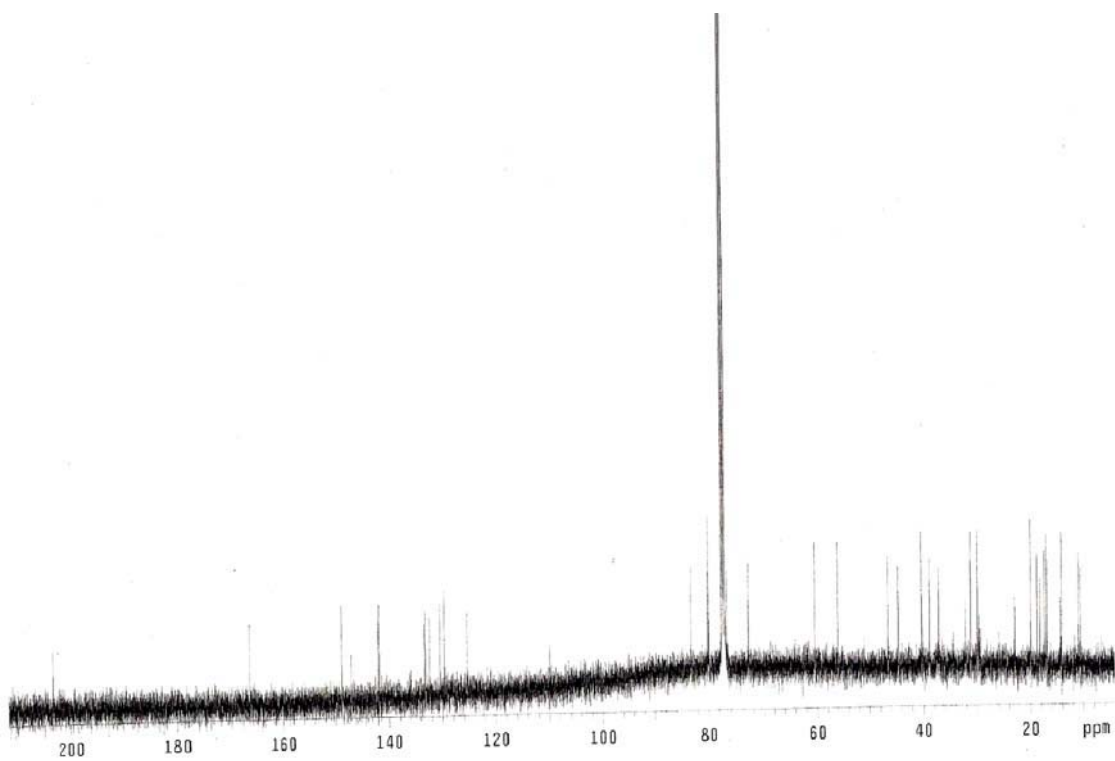

**Figure S2** <sup>13</sup>C NMR spectrum of **1** (125 MHz, CDCl<sub>3</sub>)

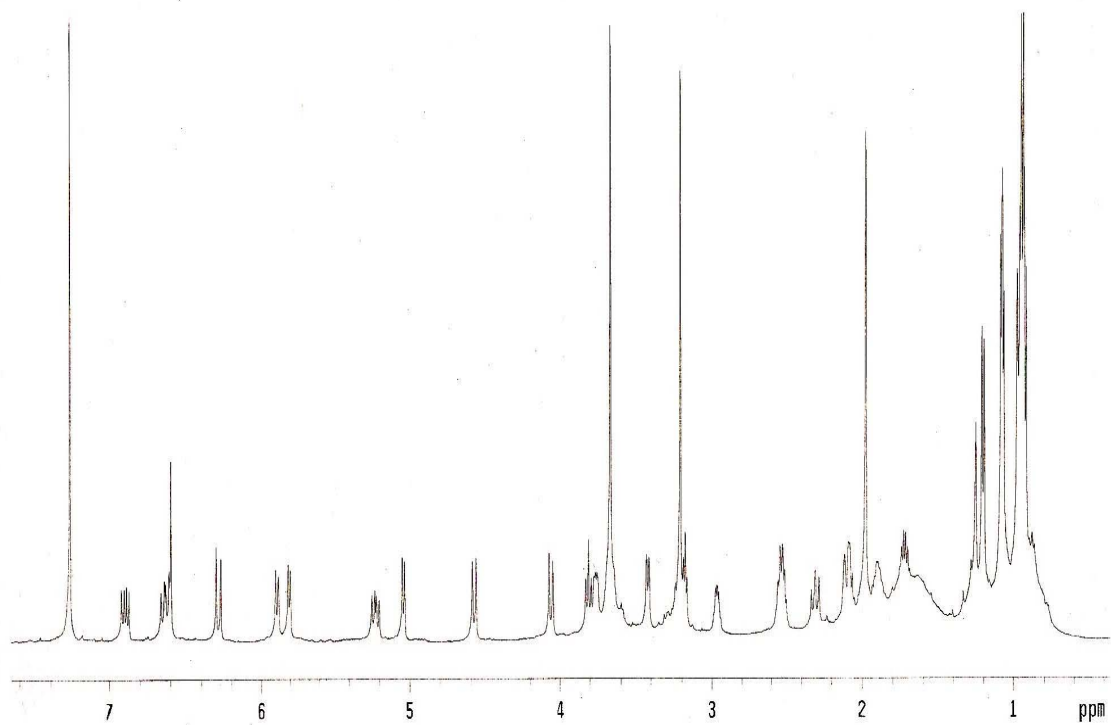

**Figure S3**  $^1\text{H}$  NMR spectrum of **2** (500 MHz,  $\text{CDCl}_3$ )

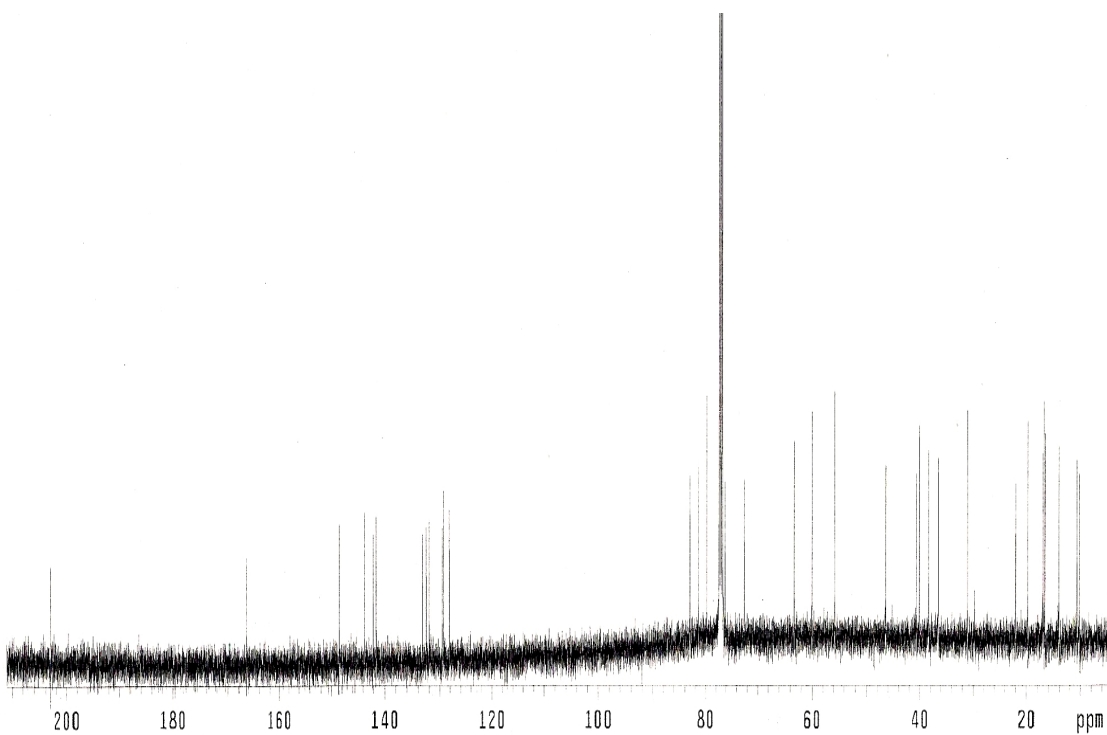

**Figure S4**  $^{13}\text{C}$  NMR spectrum of **2** (125 MHz,  $\text{CDCl}_3$ )
